# Supplementary material for: Can we use it? On the utility of de novo and reference-based assembly of Nanopore data for plant plastome sequencing
Source: PubMed Central journal article supplement (PMC7092973; doi:10.1371/journal.pone.0226234), 2020-03-24
Supplement: pone.0226234.s006.pdf [file pone.0226234.s006.pdf]

*Leucanthemum virgatum*  
chloroplast genome  
150,120 bp

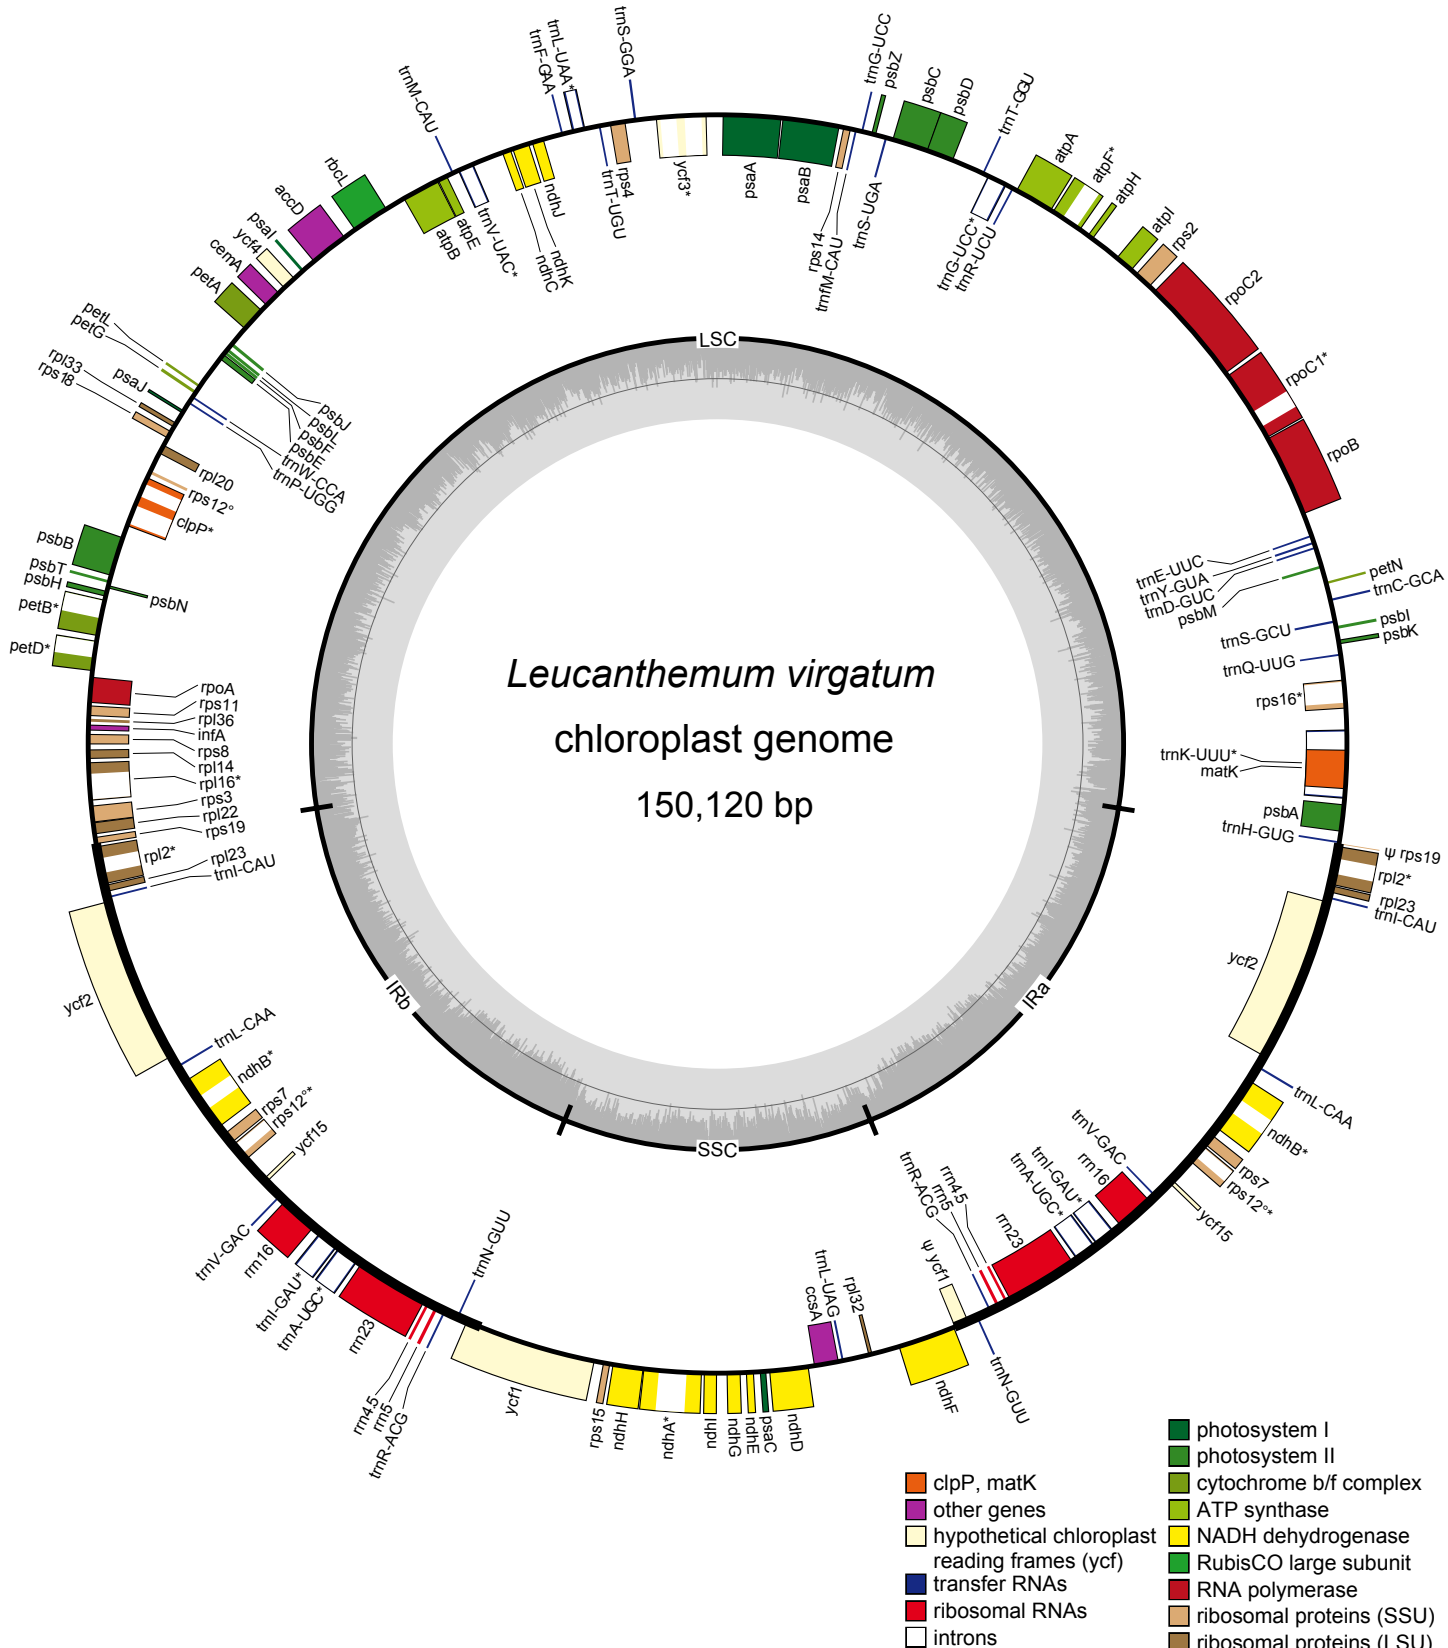

- photosystem I
- photosystem II
- cytochrome b/f complex
- ATP synthase
- NADH dehydrogenase
- RubisCO large subunit
- RNA polymerase
- ribosomal proteins (SSU)
- ribosomal proteins (LSU)

- clpP, matK
- other genes
- hypothetical chloroplast reading frames (ycf)
- transfer RNAs
- ribosomal RNAs
- introns
